# Supplementary material
Source: publisher figshare collection journal article supplement (https://future-science-group.figshare.com/ndownloader/files/31308352)
Supplement: Supplementary file 1 [file 31308352]

| **Supplementary Table 1. Previous Systemic Treatment According to Nivolumab Line** | | | | |
| --- | --- | --- | --- | --- |
| **Nivolumab Line** | **Previous Systemic Therapy** | | | |
| **First Line** | **Second Line** | **Third Line** | **Fourth Line** |
| **Second**  **(n=82)** | Sunitinib=50  Pazopanib=32 |  |  |  |
| **Third**  **(n=56)** | Interferon=40  Sunitinib=10  Pazopanib=5  Sorafenib=1 | Sunitinib=21  Pazopanib=19  Axitinib=12  Everolimus=4 |
| **Fourth**  **(n=25)** | Interferon=19  Sunitinib=4  Pazopanib=2 | Sunitinib=15  Everolimus=4  Pazopanib=3  Axitinib=3 | Axitinib=17  Everolimus=5  Sunitinib=1  Pazopanib=1 |
| **Fifth**  **(n=10)** | Interferon=10 | Sunitinib=7  Pazopanib=2  Axitinib=1 | Everolimus=9  Axitinib=1 | Axitinib=7  Sunitinib=2  Everolimus=1 |
